# Supplementary material for: Taking off the training wheels: the properties of a dynamic vegetation model without climate envelopes, CLM4.5(ED)
Source: Copernicus journal article supplement (doi:10.5194/gmd-8-3593-2015), 2015-11-06
Supplement: Supplementary file 2 [file gmd-8-3593-2015-supplement.zip]

Archive with 11 entries (8 files):
- gmd-8-3593-2015-supplement-title-page.pdf
- __MACOSX/
- __MACOSX/._GMD_SI_Fisher_sept14
- __MACOSX/GMD_SI_Fisher_sept14/
- __MACOSX/GMD_SI_Fisher_sept14/._.DS_Store
- __MACOSX/GMD_SI_Fisher_sept14/._CLM4.5(ED)_GMD_technical_documentation_sep14.pdf
- __MACOSX/GMD_SI_Fisher_sept14/._GMD_SI_aug20.pdf
- GMD_SI_Fisher_sept14/
- GMD_SI_Fisher_sept14/Supplement B oct 16.pdf
- GMD_SI_Fisher_sept14/.DS_Store
- GMD_SI_Fisher_sept14/Supplement A oct16.pdf
