# Supplementary material for: Taking off the training wheels: the properties of a dynamic vegetation model without climate envelopes, CLM4.5(ED)
Source: Copernicus journal article supplement (doi:10.5194/gmd-8-3593-2015), 2015-11-06
Supplement: Supplementary file 2 [file gmd-8-3593-2015-supplement.zip › gmd-8-3593-2015-supplement-title-page.pdf]

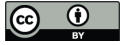

## *Supplement of*

# **Taking off the training wheels: the properties of a dynamic vegetation model without climate envelopes, CLM4.5(ED)**

**R. A. Fisher et al.**

*Correspondence to:* R. A. Fisher (rfisher@ucar.edu)

- gmd-8-3593-2015-supplement-title-page.pdf
- GMD\_SI\_Fisher\_sept14
  - .DS\_Store
  - Supplement A oct16.pdf
  - Supplement B oct 16.pdf
- \_\_MACOSX
  - .\_GMD\_SI\_Fisher\_sept14
  - GMD\_SI\_Fisher\_sept14
    - \* .\_DS\_Store
    - \* .\_CLM4.5(ED)\_GMD\_technical\_documentation\_sep14.pdf
    - \* .\_GMD\_SI\_aug20.pdf

The copyright of individual parts of the supplement might differ from the CC-BY 3.0 licence.
